# Supplementary material
Source: Atypon-hosted journal article supplement (https://static.yanyin.tech/literature/current_protocol/10.1002/cpz1.506/attachments/downloadSupplement)
Supplement: downloadSupplement [file downloadSupplement]

## Sheet: Sheet1
Supplementary File 1: RAW data files used for example analysis
Example analysis performed using data from:
Carnielli, C.M., Macedo, C.C.S., De Rossi, T. et al. Combining discovery and targeted proteomics reveals a prognostic signature in oral cancer. Nat Commun 9, 3598 (2018). https://doi.org/10.1038/s41467-018-05696-2
Downloaded on 21st Feb 2022 from http://ftp.ebi.ac.uk/pride-archive/2018/09/PXD007232/
.RAW file name	Patient number	Tumor area
03out_CarolCC_IBT0417031_E	15	stroma from the invasive tumor front
04out_CarolCC_R8 B2741101_E	20	stroma from the invasive tumor front
05set_CarolCC_B22194_E	13	stroma from the invasive tumor front
07nov_CarolCC_052270R_E	6	stroma from the invasive tumor front
07nov_CarolCC_303868_E	14	stroma from the invasive tumor front
09dez_CarolCC_0223869_E	3	stroma from the invasive tumor front
10dez_CarolCC_253535_E	10	stroma from the invasive tumor front
10out_CarolCC_R8B250294_E	19	stroma from the invasive tumor front
12dez_CarolCC_81965321_E	11	stroma from the invasive tumor front
12set_CarolCC_233141_E	9	stroma from the invasive tumor front
13dez_CarolCC_0109153_E	1	stroma from the invasive tumor front
13set_CarolCC_9811404_E	12	stroma from the invasive tumor front
14jan_CarolCC_R82 B277973_E	18	stroma from the invasive tumor front
15jan_CarolCC_R81B270815_E	16	stroma from the invasive tumor front
19set_CarolCC_0430091_E	5	stroma from the invasive tumor front
22set_CarolCC_04283871_E	4	stroma from the invasive tumor front
25nov_CarolCC_R82B205998_E	17	stroma from the invasive tumor front
25set_CarolCC_0123123_E	2	stroma from the invasive tumor front
26set_CarolCC_166945_E	8	stroma from the invasive tumor front
27set_CarolCC_151114_E	7	stroma from the invasive tumor front
